# Supplementary material for: Optimising recruitment into trials using an internal pilot
Source: PubMed Central journal article supplement (PMC6458725; doi:10.1186/s13063-019-3296-5), 2019-04-11
Supplement: 13063_2019_3296_MOESM3_ESM.pdf [file 13063_2019_3296_MOESM3_ESM.pdf]

### Expression of Interest Questionnaire

| <b>Trial Site Team</b>                                                                                          |  |
|-----------------------------------------------------------------------------------------------------------------|--|
| <b>Hospital Name &amp; Trust</b>                                                                                |  |
| Principal Investigator                                                                                          |  |
| PI Email & phone number                                                                                         |  |
| PI mailing address                                                                                              |  |
| Co-Investigator(s)                                                                                              |  |
| Co- Inv Email & phone number                                                                                    |  |
| Research Nurse/Physio/CTO                                                                                       |  |
| Researcher email & phone number                                                                                 |  |
| Researcher address                                                                                              |  |
| Extended Scope Practitioner (ESP)                                                                               |  |
| ESP email & phone number                                                                                        |  |
| ESP address                                                                                                     |  |
| R&D Contact                                                                                                     |  |
| R&D email & phone number                                                                                        |  |
| R&D address                                                                                                     |  |
| Please list any additional staff who will be involved in the STAR trial at your site including contact details. |  |

### Expression of Interest Questionnaire

| <b>Screening, Recruitment &amp; Intervention</b>                                                                                        |  |
|-----------------------------------------------------------------------------------------------------------------------------------------|--|
| How many consultants in your Trust perform total knee replacements?                                                                     |  |
| How many primary total knee replacements are carried out in your trust per year? Please provide the source of this number.              |  |
| What is the current standard care package in your trust for patients following primary total knee replacement?                          |  |
| What methods will you use to screen patients who have had a total knee replacement for osteoarthritis? (e.g. theatre lists, IT systems) |  |
| How many clinical research studies are currently active in your orthopaedic department?                                                 |  |
| Are there any conflicting studies in set up or actively recruiting? Please list study titles.                                           |  |
| How many clinical research studies is the PI currently involved in? Please list study titles.                                           |  |
| How many clinical research studies is/are the researcher(s) working on? (Please include studies in set-up, recruitment and follow-up).  |  |

## Expression of Interest Questionnaire

| <b>Excess Treatment Costs</b>                                                                                                                                                                          |  |
|--------------------------------------------------------------------------------------------------------------------------------------------------------------------------------------------------------|--|
| Do you have support from your R&D Department and the relevant clinical area to support excess treatment costs of up to £4000 per year? Please list the name and contact details of the relevant staff. |  |

| <b>Study Team</b>                                                                                                                                                                                                                                                                            |  |
|----------------------------------------------------------------------------------------------------------------------------------------------------------------------------------------------------------------------------------------------------------------------------------------------|--|
| This study involves home visits for recruitment consultations with potential participants. Are the local research team able to be mobile to perform home visits? <i>Please describe and include any experience the study team have undertaking home visits and any lone worker policies.</i> |  |
| How much time (in WTE) is available for research staff to screen and recruit for STAR?                                                                                                                                                                                                       |  |
| Who is the named Orthopaedic Knee Consultant who will provide clinic oversight for the STAR Trial?                                                                                                                                                                                           |  |
| Is an Extended Scope Practitioner (ESP) clinician available to deliver the STAR intervention and follow-up calls? This involves approximately 1-2 STAR clinics per month at up to four hours per clinic.                                                                                     |  |
| Is the ESP willing to attend an intervention training day in Bristol? Travel expenses will be reimbursed.                                                                                                                                                                                    |  |

## Expression of Interest Questionnaire

### Clinical Facilities

|                                                                                   |  |
|-----------------------------------------------------------------------------------|--|
| Is clinic space available for a twice monthly STAR clinic?                        |  |
| Are facilities available to perform the required radiographs during STAR clinics? |  |
| Are trained staff available in clinic to draw bloods?                             |  |

### Space and Equipment:

|                                                                                                                    |  |
|--------------------------------------------------------------------------------------------------------------------|--|
| Does the study team have dedicated separate room/office for clinical research                                      |  |
| Does the site have space for storage of study related materials?                                                   |  |
| Does the site have space available for Sponsor monitoring visits?                                                  |  |
| Does the site have space for Archival of data after completion of trial?                                           |  |
| Does the site have dedicated cupboard/filing cabinet for study document storage (CRFs, participant study folders)? |  |
| Does the research team have a dedicated phone line which can be used as a point of contact for STAR participants?  |  |
| Does the research team have regular access to a scanner/photocopier?                                               |  |

### Details of Person completing Form:

|                 |  |
|-----------------|--|
| Name            |  |
| Title           |  |
| Contact Details |  |
